# Supplementary material
Source: Springer Nature journal article supplement (https://www.springermedizin.de/resource/supplementary/12889_2009_1867_MOESM1_ESM.pdf/9504240)
Supplement: MOESM1 [file 9504240]

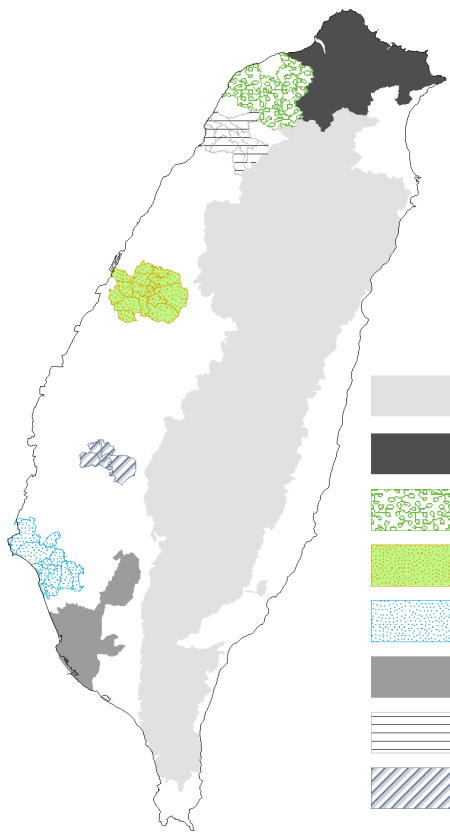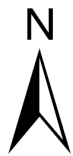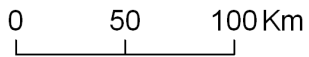

-  Aboriginal-Townships Area
-  Taipei-Keelung Main Urban Area
-  Jhongli-Taoyuan Main Urban Area
-  Taichung-Changhua Main Urban Area
-  Tainan Urban Area
-  Kaohsiung Main Urban Area
-  Hsinchu Secondary Urban Area
-  Chiayi Secondary Urban Area
